# Supplementary material for: XAS of tetrakis(phenyl)- and tetrakis(pentafluorophenyl)-porphyrin: an experimental and theoretical study
Source: Royal Society of Chemistry journal article supplement (doi:10.1039/c4cp03958k), 2014-11-27
Supplement: c4cp03958k2.pdf [file c4cp03958k2.pdf]

**Table 2-ESI.**  $\Gamma_{XS}$  representation products corresponding to electric dipole allowed transitions in  $D_{2h}$  symmetry.<sup>a,b</sup>

---

|           |          |          |          |          |          |          |          |          |
|-----------|----------|----------|----------|----------|----------|----------|----------|----------|
| $\otimes$ | $a_g$    | $b_{1g}$ | $b_{2g}$ | $b_{3g}$ | $a_u$    | $b_{1u}$ | $b_{2u}$ | $b_{3u}$ |
|           | $a_g$    |          |          |          |          | $b_{1u}$ | $b_{2u}$ | $b_{3u}$ |
|           | $b_{1g}$ |          |          |          | $b_{1u}$ | $b_{3u}$ | $b_{2u}$ |          |
|           | $b_{2g}$ |          |          |          | $b_{2u}$ | $b_{3u}$ | $b_{1u}$ |          |
|           | $b_{3g}$ |          |          |          | $b_{3u}$ | $b_{2u}$ | $b_{1u}$ |          |
|           | $a_u$    | $b_{1u}$ | $b_{2u}$ | $b_{3u}$ |          |          |          |          |
|           | $b_{1u}$ | $b_{1u}$ | $b_{3u}$ | $b_{2u}$ |          |          |          |          |
|           | $b_{2u}$ | $b_{2u}$ | $b_{3u}$ | $b_{1u}$ |          |          |          |          |
|           | $b_{3u}$ | $b_{3u}$ | $b_{2u}$ | $b_{1u}$ |          |          |          |          |

<sup>a</sup> $\Gamma_{XS} = b_{1u}$  implies 1s  $\pi^*$  transitions involving *pcm*-based  $\pi_{\perp}^*$  MOs. <sup>b</sup> $\Gamma_{XS} = b_{2u}$  or  $b_{3u}$  implies 1s  $\pi^*$  transitions involving Ph- and F-based  $\pi_{\parallel}^*$ .

---
