# Supplementary material for: XAS of tetrakis(phenyl)- and tetrakis(pentafluorophenyl)-porphyrin: an experimental and theoretical study
Source: Royal Society of Chemistry journal article supplement (doi:10.1039/c4cp03958k), 2014-11-27
Supplement: c4cp03958k5.pdf [file c4cp03958k5.pdf]

**Table 5-ESI** *EEs* (eV) and oscillator strengths *f* for the N 1s excitation spectrum of **I** from SR ZORA TD-DFT calculations. Only excitations lying at *EE* lower than 398 eV and having  $f \geq 10^{-3}$  and contributions  $\geq 10\%$  are reported.

|   | <i>imo</i> | <i>imol</i>                       | <i>EE</i> | $\Delta EE$ | Sym             | $f \times 10^3$ | <i>fmo</i>         | <i>fmo character</i> | <i>Assignment</i> |
|---|------------|-----------------------------------|-----------|-------------|-----------------|-----------------|--------------------|----------------------|-------------------|
| 1 | $1b_{3u}$  | N <sup>py</sup>                   | 394.28    | -           | b <sub>1u</sub> | 9.9439          | $12b_{2g}^{(100)}$ | $\pi_{\perp}^*$      | <b>A</b>          |
| 2 | $1b_{2u}$  | N <sup>pyH</sup>                  | 395.98    | 1.70        | b <sub>1u</sub> | 7.7402          | $12b_{3g}^{(100)}$ | $\pi_{\perp}^*$      | <b>B</b>          |
| 3 | $2a_g$     | N <sup>py</sup> /N <sup>pyH</sup> | 397.17    | 2.89        | b <sub>1u</sub> | 10.306          | $15b_{1u}^{(97)}$  | $\pi_{\perp}^*$      | <b>C</b>          |
| 4 | $1b_{3u}$  | N <sup>py</sup>                   | 397.59    | 3.31        | b <sub>1u</sub> | 9.9127          | $14b_{2g}^{(97)}$  | $\pi_{\perp}^*$      | <b>C</b>          |
