# Supplementary material for: XAS of tetrakis(phenyl)- and tetrakis(pentafluorophenyl)-porphyrin: an experimental and theoretical study
Source: Royal Society of Chemistry journal article supplement (doi:10.1039/c4cp03958k), 2014-11-27
Supplement: c4cp03958k6.pdf [file c4cp03958k6.pdf]

**Table 6-ESI** *EEs* (eV) and oscillator strengths *f* for the N 1s excitation spectrum of **II** from SR ZORA TD-DFT calculations. Only excitations lying at *EE* lower than 398 eV and having  $f \geq 10^{-3}$  and contributions  $\geq 10\%$  are reported.

|   | <i>imo</i> | <i>imol</i>      | <i>EE</i> | $\Delta EE$ | Sym             | $f \times 10^3$ | <i>fmo</i>         | <i>fmo character</i> | <i>Assignment</i> |
|---|------------|------------------|-----------|-------------|-----------------|-----------------|--------------------|----------------------|-------------------|
| 1 | $4b_{3u}$  | N <sup>py</sup>  | 394.21    | -           | b <sub>1u</sub> | 9.4518          | $21b_{2g}^{(100)}$ | $\pi_{\perp}^*$      | <b>A</b>          |
| 2 | $4b_{2u}$  | N <sup>pyH</sup> | 395.95    | 1.74        | b <sub>1u</sub> | 7.1869          | $21b_{3g}^{(100)}$ | $\pi_{\perp}^*$      | <b>B</b>          |
| 3 | $5a_g$     | N <sup>py</sup>  | 397.17    | 2.96        | b <sub>1u</sub> | 9.6101          | $24b_{1u}^{(98)}$  | $\pi_{\perp}^*$      | <b>C</b>          |
| 4 | $4b_{3u}$  | N <sup>py</sup>  | 397.55    | 3.34        | b <sub>1u</sub> | 4.3849          | $23b_{2g}^{(97)}$  | $\pi_{\perp}^*$      | <b>C</b>          |
| 5 | $4b_{3u}$  | N <sup>py</sup>  | 397.95    | 3.74        | b <sub>1u</sub> | 8.8200          | $24b_{2g}^{(91)}$  | $\pi_{\perp}^*$      | <b>C</b>          |
